# Supplementary material for: Transformation of Stimulus Correlations by the Retina
Source: PubMed Central journal article supplement (PMC3854086; doi:10.1371/journal.pcbi.1003344), 2013-12-05
Supplement: pcbi.1003344.s007.pdf [file pcbi.1003344.s007.pdf]

## Text S1

**Dependence of output correlation on gain and firing rate.** In the main text we found that gain adaptation contributes to decorrelation in a population of LN neurons. To gain further insight into why this should be the case, consider a pair of simplified LN neurons with logistic nonlinearity,

$$P_i(\text{spike}|s) = 1 / (1 + \exp(-g_i(s_i - b_i))) \quad (1)$$

and small firing probabilities in each time bin. For neuron  $i$ , the gain of the model is  $g_i$ , the linear filter output is  $s_i$ , and  $b_i$  is an offset that will be adjusted to fix the average firing rate. Assuming a small firing probability amounts to assuming that  $g_i(s_i - b_i) \ll 0$  with high probability. Thus, the exponential term in  $P_i(\text{spike}|s)$  dominates, and the stimulus-dependent firing probability simplifies to  $P_i(\text{spike}|s) = \exp(g_i(s_i - b_i))$ . The average firing probability of one neuron is now

$$P_i = \langle \exp(g_i(s_i - b_i)) \rangle, \quad (2)$$

where the average is over the distribution of the filter output  $s_i$ , which can be approximated by the central limit theorem as a zero-mean Gaussian. (A nonzero mean could simply be absorbed into a redefinition of  $b_i$ .) Using standard properties of Gaussian integrals, the averaging gives

$$P_i = \exp [1/2(g_i\sigma_i)^2 - g_ib_i], \quad (3)$$

where  $\sigma_i$  is the standard deviation of  $s_i$ . Note that, by the low firing probability assumption,  $P_1 \ll 1$  and  $P_2 \ll 1$ .

The average probability of simultaneous firing of two neurons is then given by

$$P_{12} = \langle \exp(g_1(s_1 - b_1)) \exp(g_2(s_2 - b_2)) \rangle \quad (4)$$

$$= \langle \exp(g_1s_1 + g_2s_2 - g_1b_1 - g_2b_2) \rangle. \quad (5)$$

Assuming that the filter outputs are jointly Gaussian with correlation  $\rho_s$ , the variance of  $g_1s_1 + g_2s_2$  is

$(g_1\sigma_1)^2 + (g_2\sigma_2)^2 + 2(g_1\sigma_1)\rho_s(g_2\sigma_2)$  . The expectation can therefore be computed as

$$P_{12} = \exp [1/2((g_1\sigma_1)^2 + (g_2\sigma_2)^2 + 2(g_1\sigma_1)\rho_s(g_2\sigma_2)) - g_1b_1 - g_2b_2] \quad (6)$$

$$= P_1P_2 \exp [(g_1\sigma_1)\rho_s(g_2\sigma_2)]. \quad (7)$$

The variance in firing of each neuron is  $P_i(1 - P_i)$ , and the covariance between the two is  $P_{12} - P_1P_2$ .

The correlation coefficient of the two spike trains is then given by

$$\rho = \frac{P_{12} - P_1P_2}{\sqrt{P_1(1 - P_1)P_2(1 - P_2)}}, \quad (8)$$

which, using the above result for  $P_{12}$  and taking the limit of small  $P_i$ , simplifies to

$$\rho = \sqrt{P_1P_2} \left( e^{(g_1\sigma_1)\rho_s(g_2\sigma_2)} - 1 \right). \quad (9)$$

Thus there are three ways to reduce output correlations in this simple model: lower the overall firing rates, decrease  $\rho_s$  by filter adaptation, or lower the rescaled gains  $g_i\sigma_i$ .
